# Supplementary material for: Production of liquid fuel intermediates from furfural via aldol condensation over Lewis acid zeolite catalysts
Source: Royal Society of Chemistry journal article supplement (doi:10.1039/c7cy01028a), 2017-01-01
Supplement: c7cy01028a1.pdf [file c7cy01028a1.pdf]

**Supplementary information**

**Production of liquid fuel intermediates from furfural via aldol condensation over  
Lewis acid zeolite catalysts**

Mingxue Su<sup>a</sup>, Wenzhi Li<sup>a,\*</sup>, Tingwei Zhang<sup>a</sup>, HaoSheng Xin<sup>b</sup>, Song Li<sup>c</sup>, Wei Fan<sup>d,\*</sup>  
and Longlong Ma<sup>c</sup>

<sup>a</sup> Laboratory of Basic Research in Biomass Conversion and Utilization, Department of Thermal Science and Energy Engineering, University of Science and Technology of China, Hefei 230026, China

<sup>b</sup> Institute of Materials and Chemical Engineering, Anhui Jianzhu University, Hefei 230022, China

<sup>c</sup> CAS Key Laboratory of Renewable Energy, Guangzhou Institute of Energy Conversion, Chinese Academy of Sciences, Guangzhou 510640, China

<sup>d</sup> Chemical Engineering Department, University of Massachusetts Amherst, 686 N. Pleasant Street, Amherst, MA01003, USA.

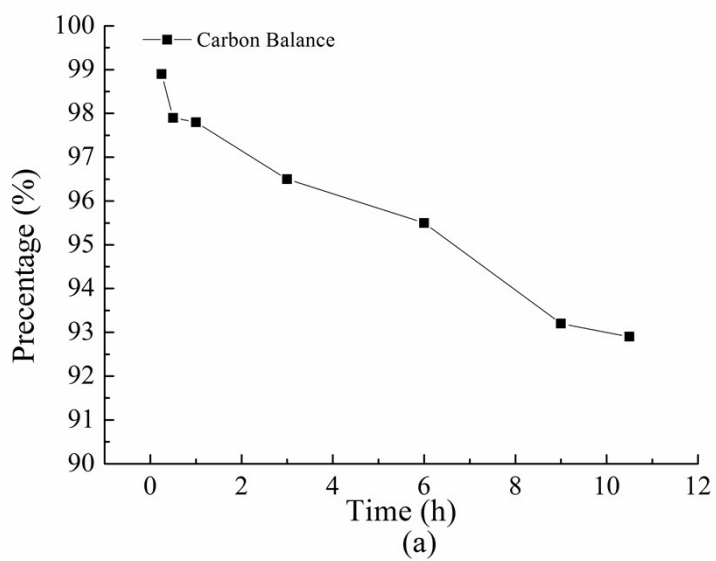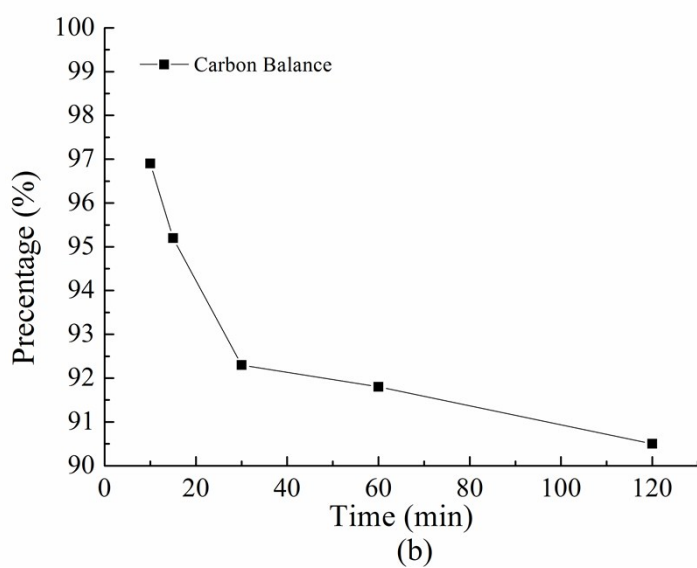

Fig.S1 Carbon balance over Sn-MFI (a) and Sn-Beta (b).

The carbon balance decreased from 98.9% to 92.9% over Sn-MFI and 96.9% to 90.5% over Sn-Beta with the reaction time increasing, respectively. The results indicated Sn-Beta produced more side reactions compared with Sn-MFI.

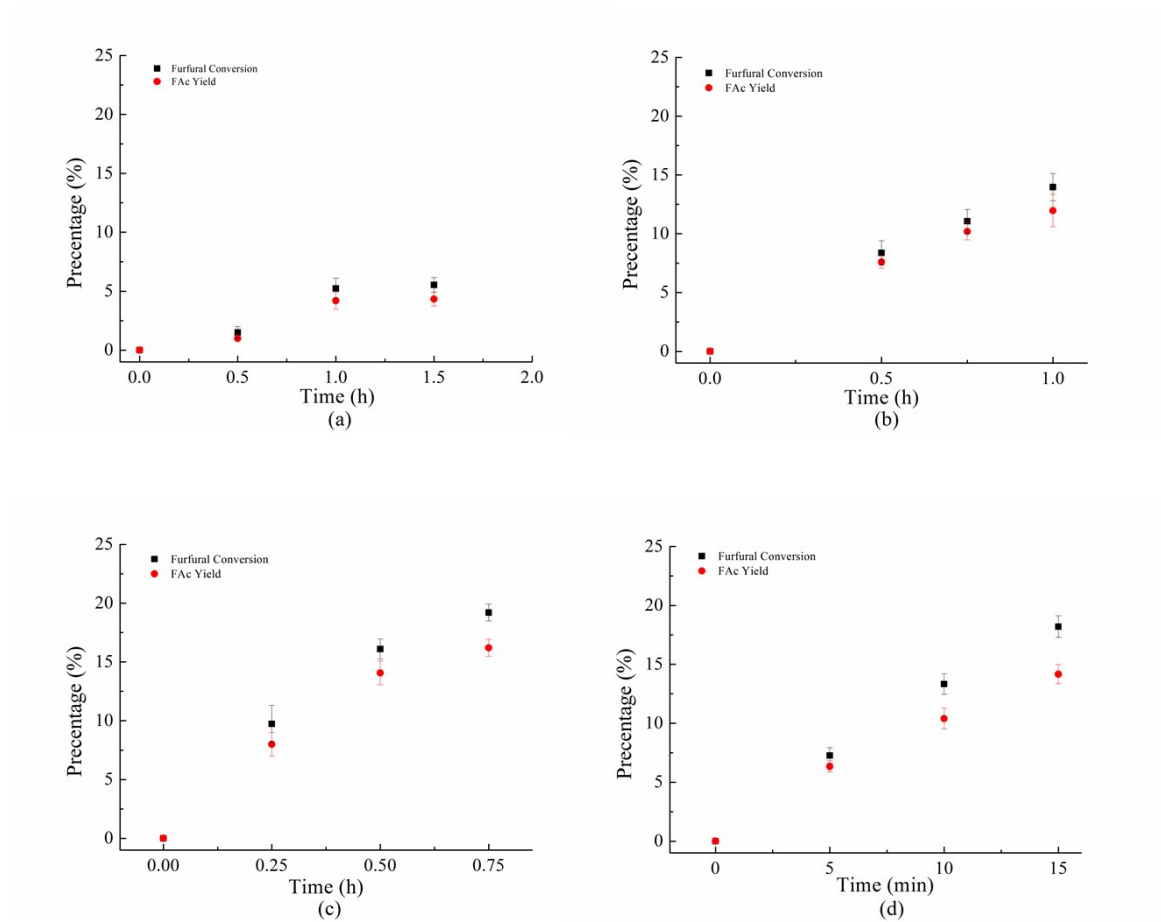

Fig.S2 Reaction kinetics data over Sn-MFI lower than 20%: (a)100°C, (b)120°C, (c)140°C, (d)160°C.

The experiment was repeated three times to obtain the error bar.

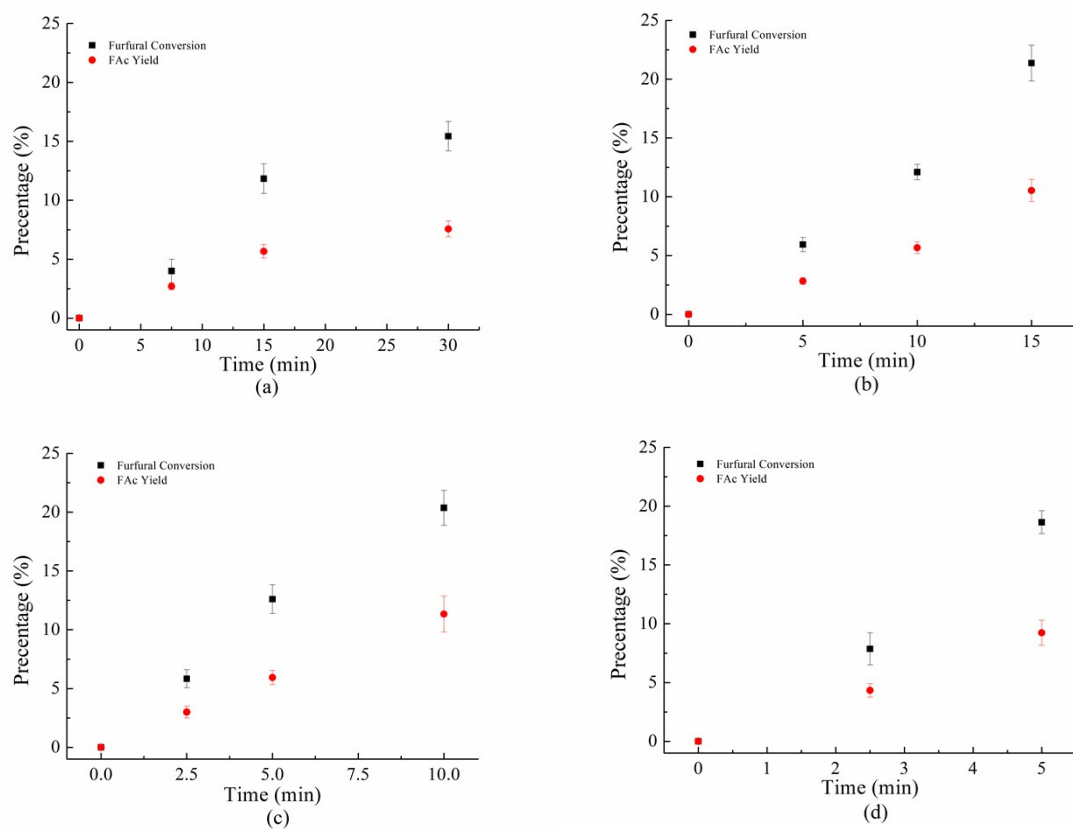

Fig.S3 Reaction kinetics data over Sn-Beta lower than 20%: (a)100°C, (b)120°C, (c)140°C, (d)160°C.

The experiment was repeated three times to obtain the error bar.

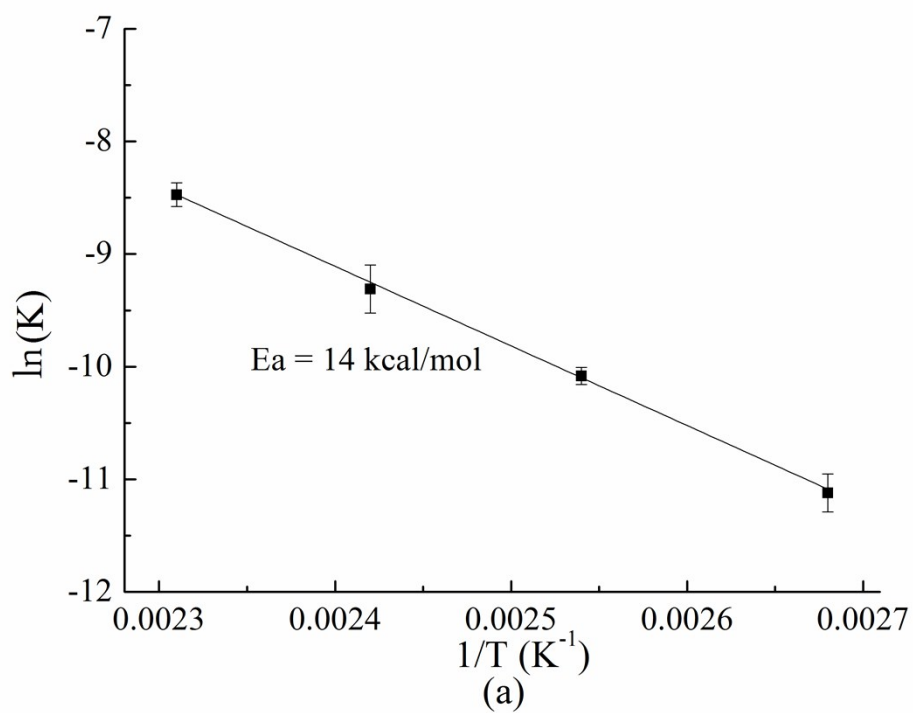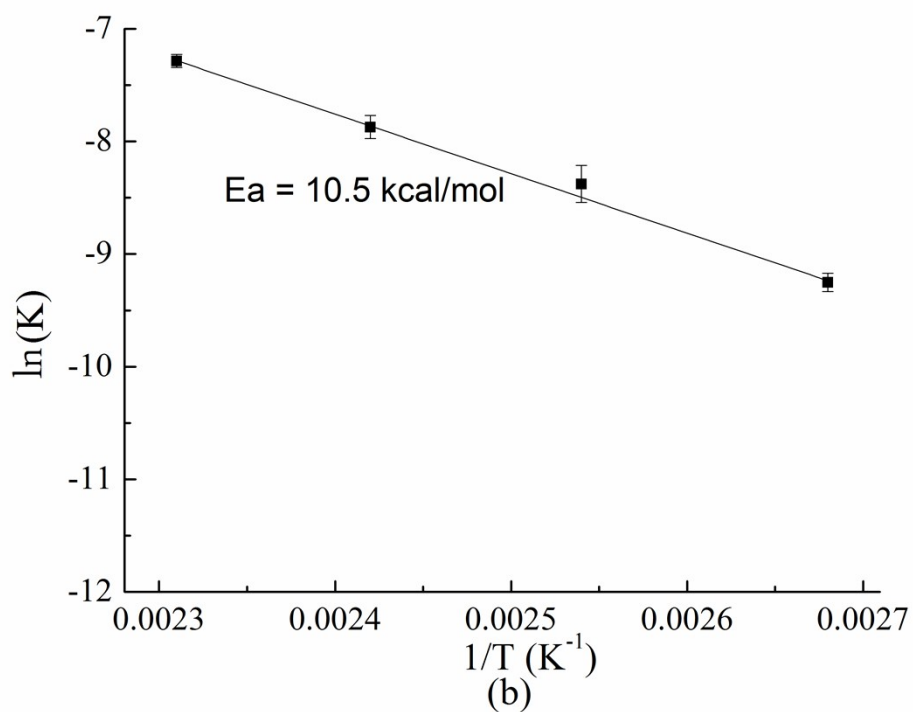

Fig.S4 The activation energy of aldol condensation reaction between furfural and acetone (a) catalyzed by Sn-MFI and (b) catalyzed by Sn-Beta

### Identification of the presence of F<sub>2</sub>A in the reaction mixture.

Reaction product F<sub>2</sub>A, 1,5-bis-(2-furanyl)-1,4-pentadien-3-one, was identified in the reaction medium with a GC-MS by assignation of their fragmentation patterns, although they were not contained in the reference spectral library. Fig.S4 showed the corresponding mass spectrometry fragmentation patterns of this compounds, which was according with previous literature<sup>1</sup>. Its response factors were assumed to be similar of that of Phenyl salicylate.

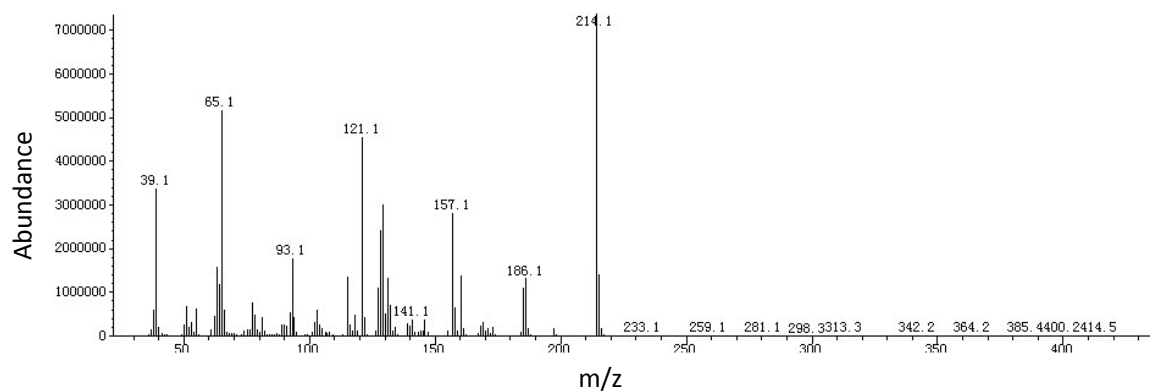

Fig.S5 MS fragmentation pattern of F<sub>2</sub>A.

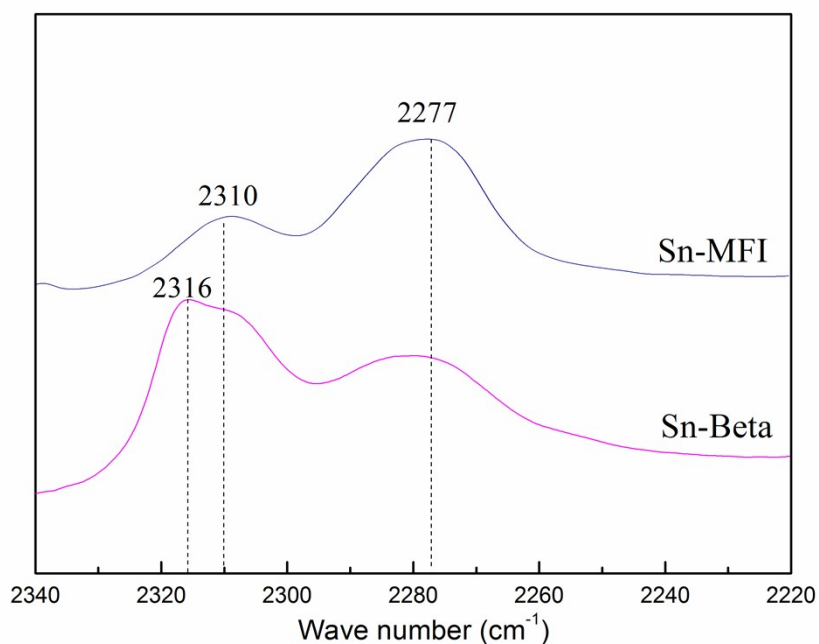

Fig. S6 FT-IR spectra of Sn-MFI and Sn-Beta after adsorbing deuterated acetonitrile  
 The FT-IR spectra of Sn-MFI and Sn-Beta displayed bonds near  $2277\text{ cm}^{-1}$ , in accord with the  $\nu(\text{C}\equiv\text{N})$  stretching mode of acetonitrile adsorbed on the silanol groups. The bonds close  $2310\text{ cm}^{-1}$  and  $2316\text{ cm}^{-1}$  were united with  $\text{CD}_3\text{CN}$  tied to isomorphously substituted Sn Lewis acid sites of Sn-MFI and Sn-Beta, respectively. The total Tin sites can be considered as the active sites for the aldol condensation between furfural and acetone.

Table.S1 The difference in the selectivity to aldol products over Sn-Beta in the absence and presence of water at the same furfural conversion

| Furfural<br>conversion (%) | Selectivity without water (%) |                   | Selectivity with water (%) |                   |
|----------------------------|-------------------------------|-------------------|----------------------------|-------------------|
|                            | FAc                           | F <sub>2</sub> Ac | FAc                        | F <sub>2</sub> Ac |
| 87                         | 44                            | 23                | 46                         | 18                |
| 50                         | 52                            | 28                | 42                         | 0                 |
| 40                         | 45                            | 20                | 28                         | 0                 |

Table.S2 the reaction rate based per Sn site for Sn-MFI and Sn-Beta  
( $\text{mol}_{\text{furfural consumed}} \cdot \text{mol}_{\text{Sn}}^{-1} \cdot \text{h}^{-1}$ )

| Sn-MFI  |       |       |       |       |
|---------|-------|-------|-------|-------|
|         | 160°C | 140°C | 120°C | 100°C |
| 60min   |       |       | 12.5  | 4.7   |
| 45min   |       | 22.8  | 13.2  |       |
| 30min   |       | 28.7  | 15.0  | 2.6   |
| 15min   | 65.0  | 34.6  |       |       |
| 10min   | 69.8  |       |       |       |
| 5min    | 78.5  |       |       |       |
| Sn-Beta |       |       |       |       |
|         | 160°C | 140°C | 120°C | 100°C |
| 30min   |       |       |       | 27.5  |
| 15min   |       |       | 76.4  | 42.1  |
| 10min   |       | 107.1 | 63.5  |       |
| 7.5min  |       |       |       | 28.5  |
| 5min    | 200.0 | 135.5 | 63.4  |       |
| 2.5min  | 167.9 | 123.2 |       |       |

## Reference

1 I. Sádaba, M. Ojeda, R. Mariscal, R. Richards and M. L. Granados, Catal. Today, 2011, 167(1), 77-83.
